# Supplementary material for: Effective posttransplant antitumor immunity is associated with TLR-stimulating nucleic acid–immunoglobulin complexes in humans
Source: JCI journal article supplement (doi:10.1172/jci44581), 2011-03-14
Supplement: sd1 [file 1]

## Supplementary Figures and Tables

**Supplemental Figure 1.** Representative flow cytometry histograms of cell subpopulations (monocytes, NK cells, myeloid (mDC) and plasmacytoid (pDC) dendritic cells, B cells and T cells) immunomagnetically purified from mononuclear cells of leukopacks collected from normal adult volunteers. The percent purity of each of the isolated subpopulations is indicated. Unstained control PBMC is outlined in grey.

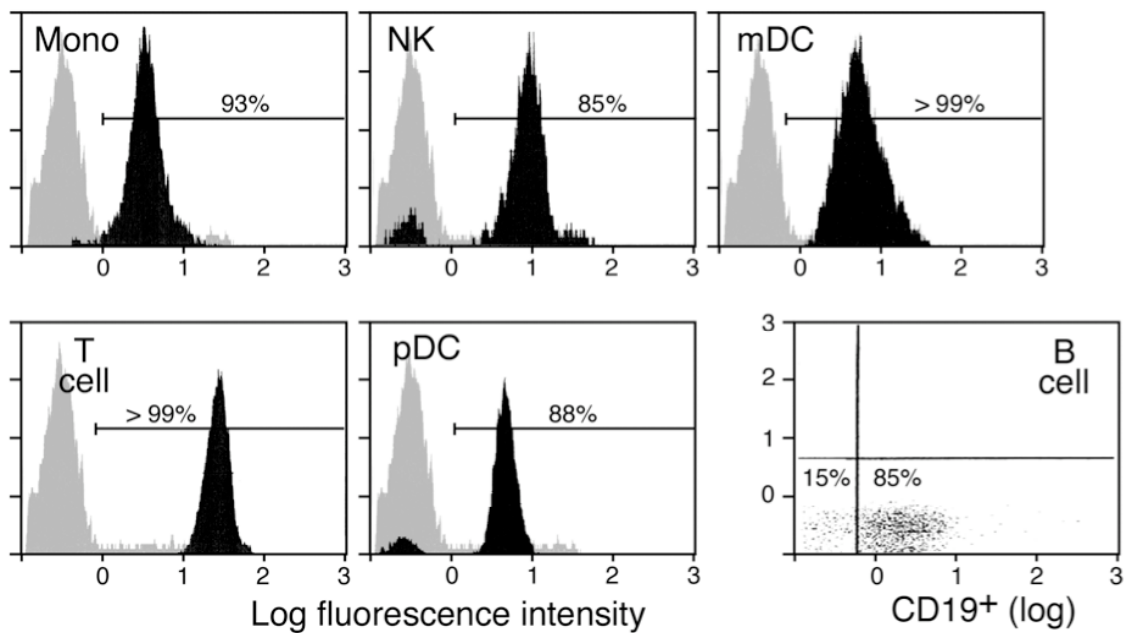

**Supplemental Figure 2.** CD32 does not enhance CpG-DNA or R848 induced stimulation of TLR9 or TLR8. HEK cells transfected with control vector, TLR9, CD32, TLR9/CD32, TLR8, or TLR8/CD32 were stimulated with (A) CpG-DNA or (B) R848 for 3 hours. IL8 was measured by QPCR.

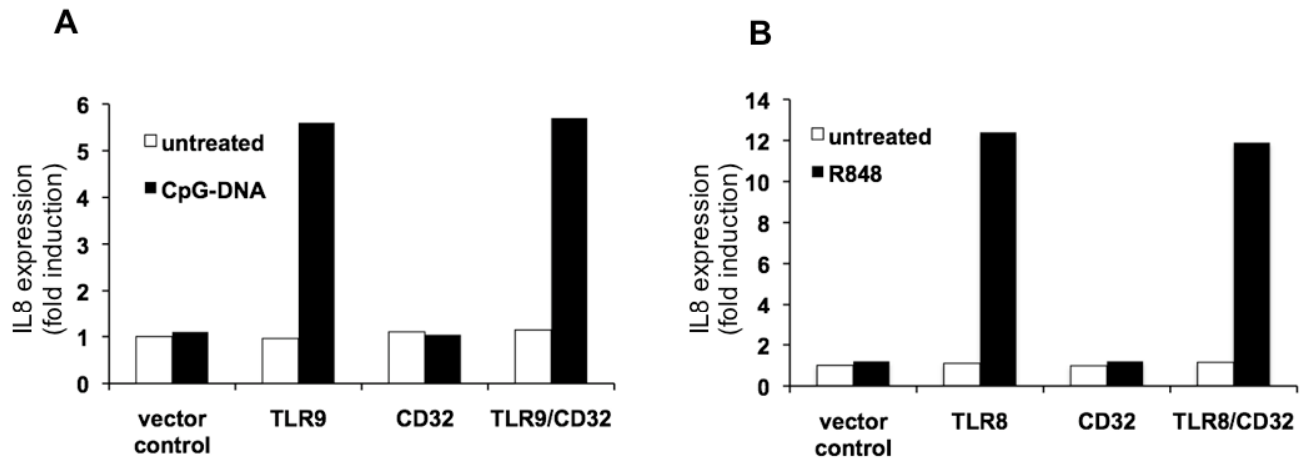

**Supplemental Figure 3.** Mean relative induction of IL-1 $\beta$  transcript expression (relative to GAPDH) of normal donor PBMC following exposure to 20% plasma derived from myeloma patients treated with donor lymphocyte infusion who responded (DLI-R, n=3), or who demonstrated absence of response (DLI-NR, n=2). For comparison, induction of IL-1 $\beta$  transcript expression for CML Patient E is shown. Significance was calculated using a one-tailed Student's t test.

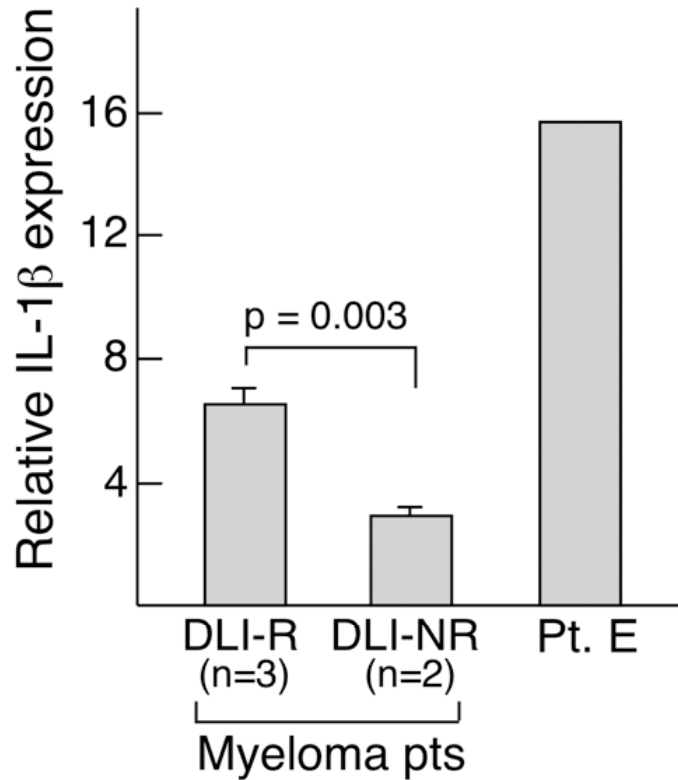

**Supplemental Table 1.** Percentage of cell subsets in the donor lymphocyte product before and following CD8 monoclonal antibody depletion, for study subjects with CML treated on the CD4+ DLI for relapsed disease following HSCT.

| Pt | % CD4 |      | % CD8 |      | % NK cells |      | % Monos | % B cells |
|----|-------|------|-------|------|------------|------|---------|-----------|
|    | pre   | post | pre   | post | pre        | post | post    | post      |
| A  | 28    | 43   | 37    | 0    | 23         | 16   | 16.7    | 3.7       |
| B  | 45    | 58.5 | 20.5  | 0.5  | 2          | 0.5  | 15.5    | 5.5       |
| C  | 41    | 45   | 24    | 0    | 10         | 7    | 35      | 6         |
| D  | 66    | 61   | 20.5  | 0    | 8          | 7.5  | 25.5    | 5.5       |
| E  | 37    | 42   | 22.5  | 0    | 12         | 8    | 33      | 2.5       |
| F  | 46.4  | 51.2 | 30.0  | 1    | 12         | 14.2 | 65.1    | 4.9       |
| G  | 44.3  | 49   | 17.4  | 0.6  | 2.8        | 2.6  | 12.5    | 4.6       |
| H  | 38.5  | 50   | 23    | 0    | 10.5       | 7    | 31      | 9         |
| I  | 44.5  | 53   | 10.5  | 0.5  | 11.5       | 7    | 16      | 6.5       |
| J  | 39    | 46   | 32    | 0    | 5          | 4    | 11      | 10        |
| K  | 27.7  | 37.4 | 7.2   | 0.7  | 5.5        | 4    | 36.9    | 9.4       |
| L  | 31.7  | 38   | 17.7  | 0.33 | 4.7        | 7    | 19.33   | 8.7       |
| S  | 47.5  | 53.5 | 21    | 0    | 115        | 8    | 20.5    | 11        |
| T  | 26    | 41   | 6     | 1    | 17         | 15   | 15      | 5         |
| U  | 44.3  | 65.4 | 7.6   | 0.7  | 8.3        | 4.6  | 9.9     | 16.1      |

**Supplementary Table 2.** mRNA expression data in PBMCs from Patient A pre and post DLI. Raw data from the Nanostring nCounter was normalized as described in methods.

| <b>Gene</b> | <b>Pre</b> | <b>1 mo</b> | <b>2 mo</b> | <b>3 mo</b> | <b>8 mo</b> |
|-------------|------------|-------------|-------------|-------------|-------------|
| CCL7        | 1.00       | 165.13      | 596.41      | 342.43      | 1.00        |
| HBEGF       | 1.00       | 57.25       | 56.35       | 37.45       | 37.83       |
| CSF1        | 1.00       | 43.96       | 40.81       | 14.87       | 9.99        |
| IL10 [I]    | 9.46       | 33.63       | 63.47       | 62.16       | 12.45       |
| CXCL9 [V]   | 1.00       | 4.10        | 8.26        | 10.39       | 1.00        |
| IL1RN       | 321.01     | 810.71      | 2939.11     | 1549.48     | 253.41      |
| CXCL1 [I]   | 1143.10    | 2453.96     | 5546.51     | 5886.72     | 1226.61     |
| IL6 [I]     | 44.72      | 78.69       | 791.64      | 328.09      | 79.31       |
| CXCL3 [I]   | 183.52     | 833.31      | 3148.58     | 3572.03     | 292.19      |
| NFKB2 [I]   | 150.69     | 263.24      | 434.55      | 332.79      | 108.19      |
| MTHFD2      | 45.82      | 60.30       | 107.52      | 101.21      | 80.38       |
| CEBPD       | 1084.99    | 2320.08     | 1463.98     | 1932.79     | 1330.21     |
| EIF5A       | 790.84     | 1235.53     | 1309.71     | 1276.72     | 1096.47     |
| REL         | 104.87     | 225.55      | 274.12      | 216.08      | 142.14      |
| IFNGR2      | 424.37     | 876.12      | 955.27      | 846.84      | 377.96      |
| EGR2        | 34.22      | 114.82      | 91.57       | 64.29       | 40.62       |
| DDIT3       | 172.98     | 507.05      | 432.78      | 293.67      | 280.87      |
| SOCS1       | 61.49      | 161.54      | 152.92      | 113.76      | 110.15      |
| ZC3H12A [I] | 77.58      | 345.78      | 289.41      | 193.05      | 377.32      |
| NLRP3       | 26.17      | 115.77      | 63.87       | 51.40       | 117.15      |
| IL12A       | 9.20       | 44.93       | 24.03       | 18.33       | 30.57       |
| LTA [I]     | 13.09      | 46.27       | 49.15       | 22.94       | 25.04       |
| KLF10       | 328.06     | 973.25      | 701.71      | 720.21      | 908.56      |
| NFKBIA [I]  | 3152.20    | 9369.72     | 8946.66     | 8236.07     | 8016.73     |
| PLAUR       | 480.55     | 1208.65     | 1783.28     | 1289.14     | 1484.95     |
| RGS1        | 861.49     | 3575.65     | 3101.40     | 2174.52     | 2183.45     |
| CD83        | 520.05     | 2000.21     | 2181.98     | 1730.70     | 1501.14     |
| EDN1        | 3.46       | 19.69       | 12.64       | 14.70       | 8.41        |
| IFIT2 [V]   | 29.76      | 123.79      | 160.06      | 90.62       | 51.50       |
| PELI1       | 216.96     | 903.97      | 1663.83     | 973.60      | 685.68      |
| IL1B [I]    | 196.75     | 463.37      | 1217.09     | 774.27      | 546.86      |
| IL1A [I]    | 21.38      | 60.20       | 155.69      | 60.76       | 57.25       |
| TNIP3       | 1.00       | 1.00        | 15.79       | 1.00        | 2.50        |
| CD70        | 1.00       | 1.00        | 2.43        | 1.00        | 1.00        |
| TLR2        | 160.81     | 161.43      | 258.42      | 205.32      | 127.43      |
| STAT5A      | 189.04     | 288.54      | 304.54      | 253.66      | 141.72      |
| IFNAR2      | 529.63     | 313.44      | 388.24      | 682.27      | 407.50      |
| TLR4        | 126.10     | 113.46      | 59.44       | 98.86       | 113.64      |
| MYD88       | 426.98     | 245.25      | 266.70      | 210.41      | 389.06      |
| CLEC2B      | 1146.68    | 1069.42     | 681.41      | 583.04      | 985.11      |
| HHEX        | 252.29     | 257.30      | 131.27      | 116.98      | 222.71      |
| CEP350      | 46.76      | 32.89       | 38.65       | 42.85       | 31.05       |
| CD40        | 111.10     | 84.55       | 106.61      | 81.68       | 70.94       |
| IFIH1 [V]   | 125.49     | 86.13       | 144.43      | 125.31      | 102.05      |
| FUS         | 107.89     | 91.93       | 148.47      | 111.09      | 72.69       |
| IFIT1 [V]   | 21.38      | 15.90       | 26.56       | 27.81       | 15.24       |

|            |         |         |         |         |         |
|------------|---------|---------|---------|---------|---------|
| IL15RA     | 69.50   | 46.71   | 61.94   | 50.09   | 71.53   |
| BCL7A      | 37.43   | 23.29   | 38.14   | 30.16   | 41.49   |
| IL15       | 19.78   | 13.58   | 21.37   | 16.55   | 26.37   |
| DDX47      | 75.66   | 109.66  | 59.14   | 68.73   | 94.94   |
| GAPDH      | 4611.90 | 4702.99 | 4731.01 | 4721.65 | 4854.52 |
| PLAT [I]   | 1.00    | 1.00    | 1.00    | 1.00    | 1.00    |
| IL12B [I]  | 1.00    | 1.00    | 1.00    | 1.00    | 1.00    |
| RGS2       | 3856.65 | 4402.83 | 3215.16 | 2857.94 | 4298.51 |
| CIAPIN1    | 45.47   | 41.63   | 32.05   | 41.26   | 43.00   |
| CITED2     | 686.07  | 737.67  | 487.60  | 461.93  | 646.52  |
| TLR3 [V]   | 8.53    | 11.47   | 3.41    | 6.63    | 12.61   |
| CCND2      | 356.34  | 438.66  | 305.88  | 235.12  | 631.49  |
| YWHAZ      | 1938.22 | 3440.45 | 2396.71 | 2442.10 | 3979.00 |
| TNF [I]    | 606.70  | 1081.17 | 645.60  | 524.59  | 905.48  |
| CXCL11 [V] | 5.13    | 1.00    | 13.11   | 14.60   | 1.00    |
| IFIT3 [V]  | 44.84   | 16.40   | 93.94   | 50.38   | 16.24   |
| CXCL10 [V] | 60.78   | 4.87    | 67.66   | 29.21   | 11.92   |
| IRF7 [V]   | 320.70  | 105.46  | 235.97  | 176.00  | 193.35  |
| DNMT1      | 364.94  | 138.25  | 279.22  | 260.72  | 196.68  |
| KTN1       | 515.87  | 251.93  | 345.12  | 347.79  | 388.34  |
| NMI        | 54.41   | 21.82   | 36.76   | 19.80   | 29.95   |
| JAK1       | 669.75  | 484.67  | 360.13  | 331.13  | 408.25  |
| TICAM1     | 14.91   | 11.27   | 8.51    | 6.55    | 6.76    |
| SHFM1      | 300.57  | 170.18  | 144.01  | 155.81  | 159.34  |
| MINK1      | 220.48  | 139.92  | 75.54   | 106.65  | 99.26   |
| IRF1       | 1223.98 | 526.21  | 613.32  | 492.66  | 604.63  |
| IL7R       | 551.05  | 246.95  | 226.83  | 232.29  | 301.99  |
| TCF4       | 58.32   | 18.01   | 24.93   | 34.20   | 46.50   |
| SYK        | 297.24  | 87.51   | 108.11  | 116.98  | 206.96  |
| TREX1      | 44.78   | 46.91   | 25.18   | 28.04   | 18.58   |
| IL17RA     | 250.73  | 94.99   | 55.38   | 72.36   | 190.45  |
| HDAC1      | 564.76  | 225.05  | 183.43  | 176.00  | 429.65  |
| CD14       | 988.84  | 478.79  | 217.26  | 356.33  | 712.07  |
| FAM127A    | 166.87  | 37.07   | 66.34   | 46.85   | 85.38   |
| TNFRSF8    | 50.09   | 10.73   | 11.33   | 18.13   | 23.68   |
| IFI16      | 631.48  | 73.28   | 197.29  | 194.82  | 221.18  |
| STAT1      | 1319.67 | 170.93  | 443.72  | 365.75  | 459.67  |
| CUGBP1     | 469.71  | 172.51  | 185.00  | 160.05  | 181.03  |
| PML [V]    | 32.36   | 7.88    | 11.75   | 9.99    | 4.91    |
| IRF2       | 134.70  | 17.39   | 37.65   | 70.40   | 98.22   |
| TLR7       | 12.73   | 1.00    | 6.67    | 9.20    | 10.11   |
| IFNB1 [V]  | 5.13    | 1.87    | 1.00    | 1.00    | 1.00    |
| SAMHD1     | 1306.76 | 142.17  | 179.86  | 172.77  | 823.22  |
| FCGR3A     | 1547.61 | 179.08  | 292.07  | 230.42  | 1582.88 |
| DDX58 [V]  | 55.10   | 1.77    | 8.90    | 13.02   | 25.50   |
| IER2       | 42.26   | 1.00    | 3.56    | 2.43    | 13.25   |
| OAS1 [V]   | 70.22   | 1.00    | 6.22    | 4.21    | 22.69   |
| VISA       | 99.12   | 2.11    | 8.90    | 1.00    | 35.82   |
| AIM2 [V]   | 58.05   | 7.88    | 1.00    | 1.00    | 11.04   |

**Supplementary Table 3.** Relative mRNA expression data in PBMCs from Patient A. log<sub>2</sub> fold was calculated relative to pre-DLI values (based on data in supplementary Table2).

| <b>Gene</b> | <b>1 mo</b> | <b>2 mo</b> | <b>3 mo</b> | <b>8 mo</b> |
|-------------|-------------|-------------|-------------|-------------|
| CCL7        | 7.367       | 9.220       | 8.420       | 0.000       |
| HBEGF       | 5.839       | 5.816       | 5.227       | 5.242       |
| CSF1        | 5.458       | 5.351       | 3.894       | 3.320       |
| IL10 [I]    | 1.830       | 2.747       | 2.717       | 0.397       |
| CXCL9 [V]   | 2.035       | 3.046       | 3.377       | 0.000       |
| IL1RN       | 1.337       | 3.195       | 2.271       | -0.341      |
| CXCL1 [I]   | 1.102       | 2.279       | 2.365       | 0.102       |
| IL6 [I]     | 0.815       | 4.146       | 2.875       | 0.827       |
| CXCL3 [I]   | 2.183       | 4.101       | 4.283       | 0.671       |
| NFKB2 [I]   | 0.805       | 1.528       | 1.143       | -0.478      |
| MTHFD2      | 0.396       | 1.231       | 1.143       | 0.811       |
| CEBPD       | 1.096       | 0.432       | 0.833       | 0.294       |
| EIF5A       | 0.644       | 0.728       | 0.691       | 0.471       |
| REL         | 1.105       | 1.386       | 1.043       | 0.439       |
| IFNGR2      | 1.046       | 1.171       | 0.997       | -0.167      |
| EGR2        | 1.746       | 1.420       | 0.910       | 0.247       |
| DDIT3       | 1.552       | 1.323       | 0.764       | 0.699       |
| SOCS1       | 1.393       | 1.314       | 0.888       | 0.841       |
| ZC3H12A [I] | 2.156       | 1.899       | 1.315       | 2.282       |
| NLRP3       | 2.145       | 1.288       | 0.974       | 2.163       |
| IL12A       | 2.287       | 1.385       | 0.994       | 1.732       |
| LTA [I]     | 1.821       | 1.908       | 0.809       | 0.935       |
| KLF10       | 1.569       | 1.097       | 1.134       | 1.470       |
| NFKBIA [I]  | 1.572       | 1.505       | 1.386       | 1.347       |
| PLAUR       | 1.331       | 1.892       | 1.424       | 1.628       |
| RGS1        | 2.053       | 1.848       | 1.336       | 1.342       |
| CD83        | 1.943       | 2.069       | 1.735       | 1.529       |
| EDN1        | 2.509       | 1.869       | 2.087       | 1.281       |
| IFIT2 [V]   | 2.056       | 2.427       | 1.606       | 0.791       |
| PELI1       | 2.059       | 2.939       | 2.166       | 1.660       |
| IL1B [I]    | 1.236       | 2.629       | 1.976       | 1.475       |
| IL1A [I]    | 1.494       | 2.864       | 1.507       | 1.421       |
| TNIP3       | 0.000       | 3.981       | 0.000       | 1.324       |
| CD70        | 0.000       | 1.280       | 0.000       | 0.000       |
| TLR2        | 0.005       | 0.684       | 0.352       | -0.336      |
| STAT5A      | 0.610       | 0.688       | 0.424       | -0.416      |
| IFNAR2      | -0.757      | -0.448      | 0.365       | -0.378      |
| TLR4        | -0.152      | -1.085      | -0.351      | -0.150      |
| MYD88       | -0.800      | -0.679      | -1.021      | -0.134      |
| CLEC2B      | -0.101      | -0.751      | -0.976      | -0.219      |
| HHEX        | 0.028       | -0.943      | -1.109      | -0.180      |
| CEP350      | -0.508      | -0.275      | -0.126      | -0.591      |
| CD40        | -0.394      | -0.060      | -0.444      | -0.647      |
| IFIH1 [V]   | -0.543      | 0.203       | -0.002      | -0.298      |
| FUS         | -0.231      | 0.461       | 0.042       | -0.570      |
| IFIT1 [V]   | -0.427      | 0.313       | 0.379       | -0.489      |

|            |        |        |        |        |
|------------|--------|--------|--------|--------|
| IL15RA     | -0.573 | -0.166 | -0.473 | 0.041  |
| BCL7A      | -0.685 | 0.027  | -0.312 | 0.148  |
| IL15       | -0.542 | 0.111  | -0.257 | 0.415  |
| DDX47      | 0.535  | -0.356 | -0.139 | 0.327  |
| GAPDH      | 0.028  | 0.037  | 0.034  | 0.074  |
| PLAT [I]   | 0.000  | 0.000  | 0.000  | 0.000  |
| IL12B [I]  | 0.000  | 0.000  | 0.000  | 0.000  |
| RGS2       | 0.191  | -0.262 | -0.432 | 0.156  |
| CIAPIN1    | -0.127 | -0.505 | -0.140 | -0.081 |
| CITED2     | 0.105  | -0.493 | -0.571 | -0.086 |
| TLR3 [V]   | 0.427  | -1.323 | -0.364 | 0.564  |
| CCND2      | 0.300  | -0.220 | -0.600 | 0.826  |
| YWHAZ      | 0.828  | 0.306  | 0.333  | 1.038  |
| TNF [I]    | 0.834  | 0.090  | -0.210 | 0.578  |
| CXCL11 [V] | -1.451 | 1.067  | 0.168  | -1.466 |
| IFIT3 [V]  | -2.359 | 1.353  | 1.509  | -2.359 |
| CXCL10 [V] | -3.643 | 0.155  | -1.057 | -2.350 |
| IRF7 [V]   | -1.604 | -0.443 | -0.866 | -0.730 |
| DNMT1      | -1.400 | -0.386 | -0.485 | -0.892 |
| KTN1       | -1.034 | -0.580 | -0.569 | -0.410 |
| NMI        | -1.319 | -0.566 | -1.458 | -0.861 |
| JAK1       | -0.467 | -0.895 | -1.016 | -0.714 |
| TICAM1     | -0.404 | -0.810 | -1.186 | -1.141 |
| SHFM1      | -0.821 | -1.061 | -0.948 | -0.916 |
| MINK1      | -0.656 | -1.545 | -1.048 | -1.151 |
| IRF1       | -1.218 | -0.997 | -1.313 | -1.017 |
| IL7R       | -1.158 | -1.281 | -1.246 | -0.868 |
| TCF4       | -1.695 | -1.226 | -0.770 | -0.327 |
| SYK        | -1.764 | -1.459 | -1.345 | -0.522 |
| TREX1      | 0.067  | -0.831 | -0.676 | -1.269 |
| IL17RA     | -1.400 | -2.179 | -1.793 | -0.397 |
| HDAC1      | -1.327 | -1.622 | -1.682 | -0.394 |
| CD14       | -1.046 | -2.186 | -1.473 | -0.474 |
| FAM127A    | -2.170 | -1.331 | -1.832 | -0.967 |
| TNFRSF8    | -2.223 | -2.145 | -1.466 | -1.081 |
| IFI16      | -3.107 | -1.678 | -1.697 | -1.514 |
| STAT1      | -2.949 | -1.572 | -1.851 | -1.522 |
| CUGBP1     | -1.445 | -1.344 | -1.553 | -1.376 |
| PML [V]    | -2.038 | -1.462 | -1.695 | -2.721 |
| IRF2       | -2.954 | -1.839 | -0.936 | -0.456 |
| TLR7       | -3.670 | -0.932 | -0.468 | -0.332 |
| IFNB1 [V]  | -1.456 | -2.359 | -2.359 | -2.359 |
| SAMHD1     | -3.200 | -2.861 | -2.919 | -0.667 |
| FCGR3A     | -3.111 | -2.406 | -2.748 | 0.033  |
| DDX58 [V]  | -4.960 | -2.631 | -2.081 | -1.112 |
| IER2       | -5.401 | -3.571 | -4.120 | -1.674 |
| OAS1 [V]   | -6.134 | -3.496 | -4.061 | -1.630 |
| VISA       | -5.552 | -3.478 | -6.631 | -1.468 |
| AIM2 [V]   | -2.881 | -5.859 | -5.859 | -2.395 |
